# Supplementary material
Source: publisher site journal article supplement (https://www.dovepress.com/article/487596)
Supplement: Supplementary file 1 [file get_supplementary_file.php]

**Supplementary Material:**

| **Supplementary Table 1.** Threshold Effect Analysis of Different TyG-related Indices on OSA | | | |
| --- | --- | --- | --- |
| Variables | TyG-BMI | TyG-WC | TyG-WHtR |
| Inflection point | 317.063 | 1044.906 | 5.723 |
| <K slope | 1.010 (1.009, 1.011) <0.0001 | 1.002 (1.002, 1.003) <0.0001 | 1.475 (1.331, 1.634) <0.0001 |
| >K slope | 1.002 (1.000, 1.004) 0.0723 | 0.999 (0.998, 1.000) 0.0613 | 0.981 (0.859, 1.121) 0.7820 |
| Log-likelihood ratio test | <0.001 | <0.001 | <0.001 |
| *All covariates were adjusted.* | | | |
|

| **Supplementary Table 2.** Diagnostic Performance of TyG-related Indices for OSA | | | | | | |
| --- | --- | --- | --- | --- | --- | --- |
| Variables | AUC | 95%CI low | 95%CI upp | Best threshold | Specificity | Sensitivity |
| TyG | 0.588 | 0.576 | 0.600 | 8.505 | 0.539 | 0.596 |
| TyG-BMI | 0.644 | 0.632 | 0.656 | 241.190 | 0.585 | 0.631 |
| TyG-WHtR | 0.638 | 0.626 | 0.650 | 4.804 | 0.486 | 0.723 |
| TyG-WC | 0.647 | 0.636 | 0.659 | 814.252 | 0.524 | 0.699 |
